# Supplementary material for: Magnetic Cu–Ni (core–shell) nanoparticles in a one-pot reaction under microwave irradiation
Source: Royal Society of Chemistry journal article supplement (doi:10.1039/b9nr00302a), 2010-01-01
Supplement: b9nr00302a.pdf [file b9nr00302a.pdf]

### Supplementary Information

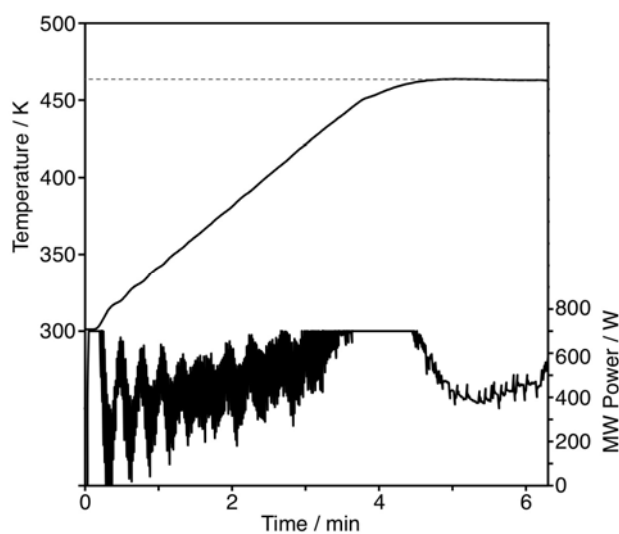

**Figure S1.** Time profile of both temperature and MW power during the synthesis of  $\text{Cu}_4\text{Ni}_6$ .

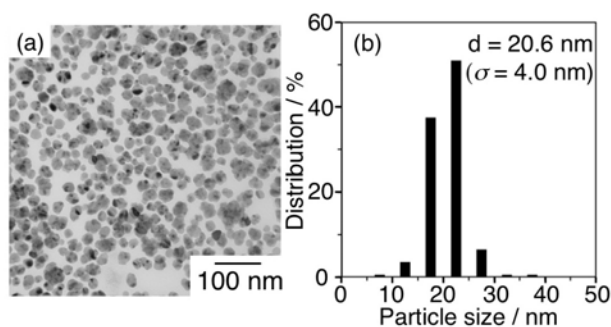

**Figure S2.** TEM image of Ni-2. The size distribution histogram was created using the diameters of 200 randomly selected particles shown in Figure S2-(a).

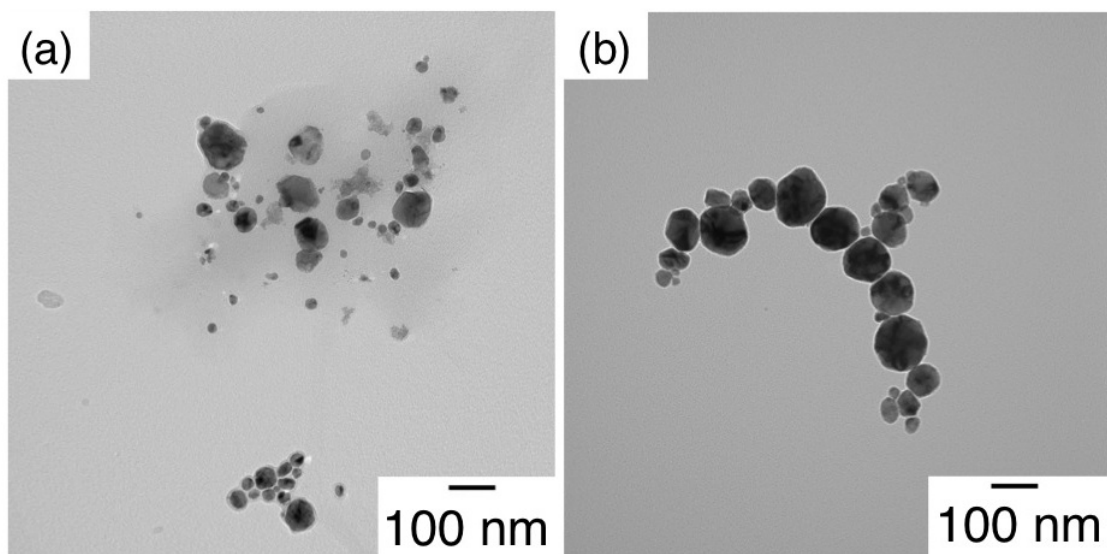

**Figure S3.** TEM images of Cu-1 (a) and Cu-2 (b).

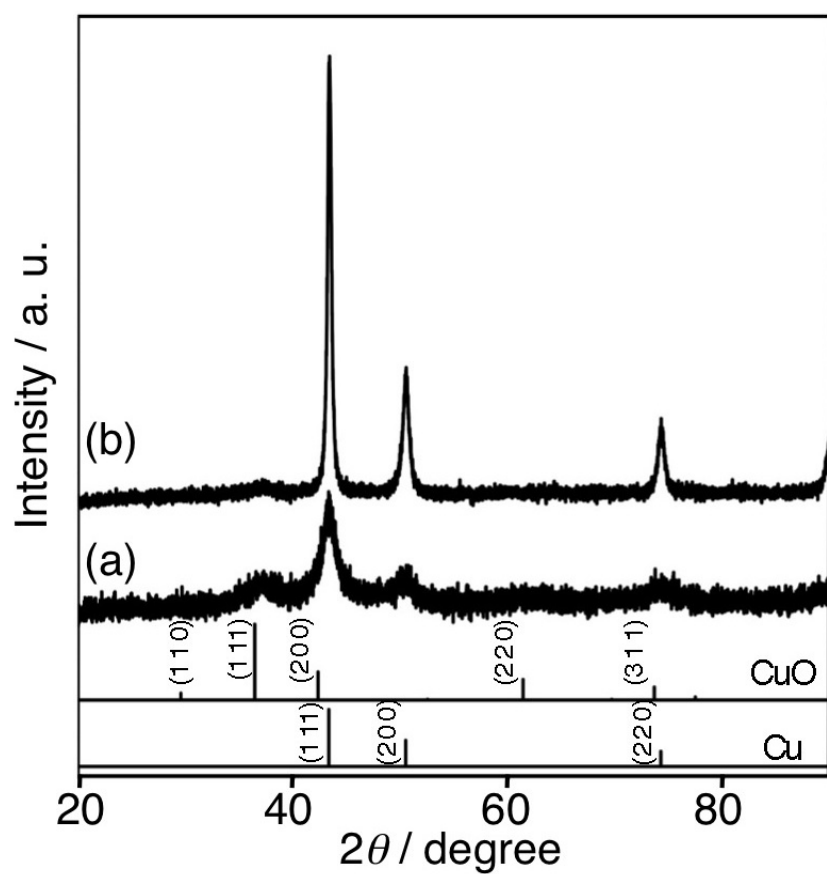

**Figure S4.** XRD patterns of Cu-1 (a) and Cu-2 (b).

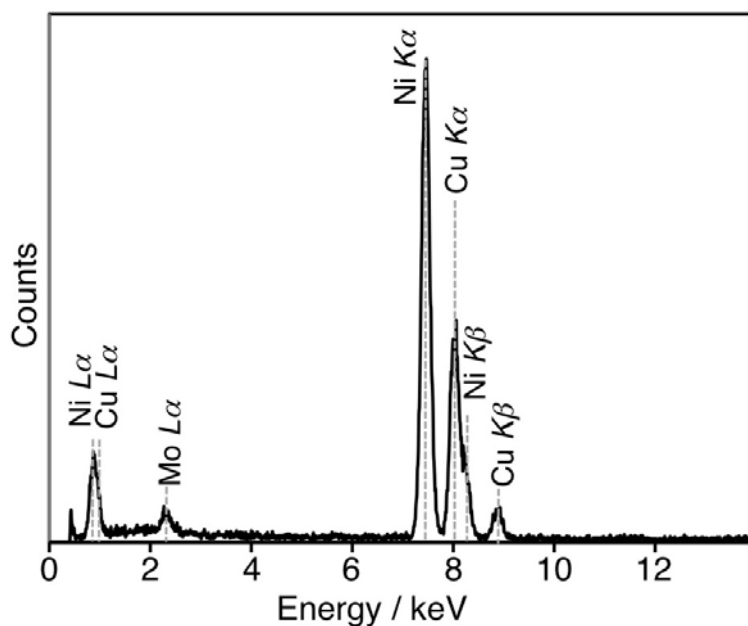

**Figure S5.** EDS spectrum of  $\text{Cu}_4\text{Ni}_6$  nanoparticles. The sample was placed on a holey carbon film supported by a molybdenum grid. The  $\text{Cu } K\alpha$  peak at around 8.0 keV overlapped with the  $\text{Ni } K\beta$  peak. The  $\text{Cu } K\alpha$  intensities were calculated by waveform separation of the intensities of the peak at around 8.0 keV. Metal compositions of the Cu-Ni nanoparticle samples listed in Table 1 were calculated based on the  $\text{Ni } K\alpha$  and  $\text{Cu } K\alpha$  intensities calculated by waveform separation.

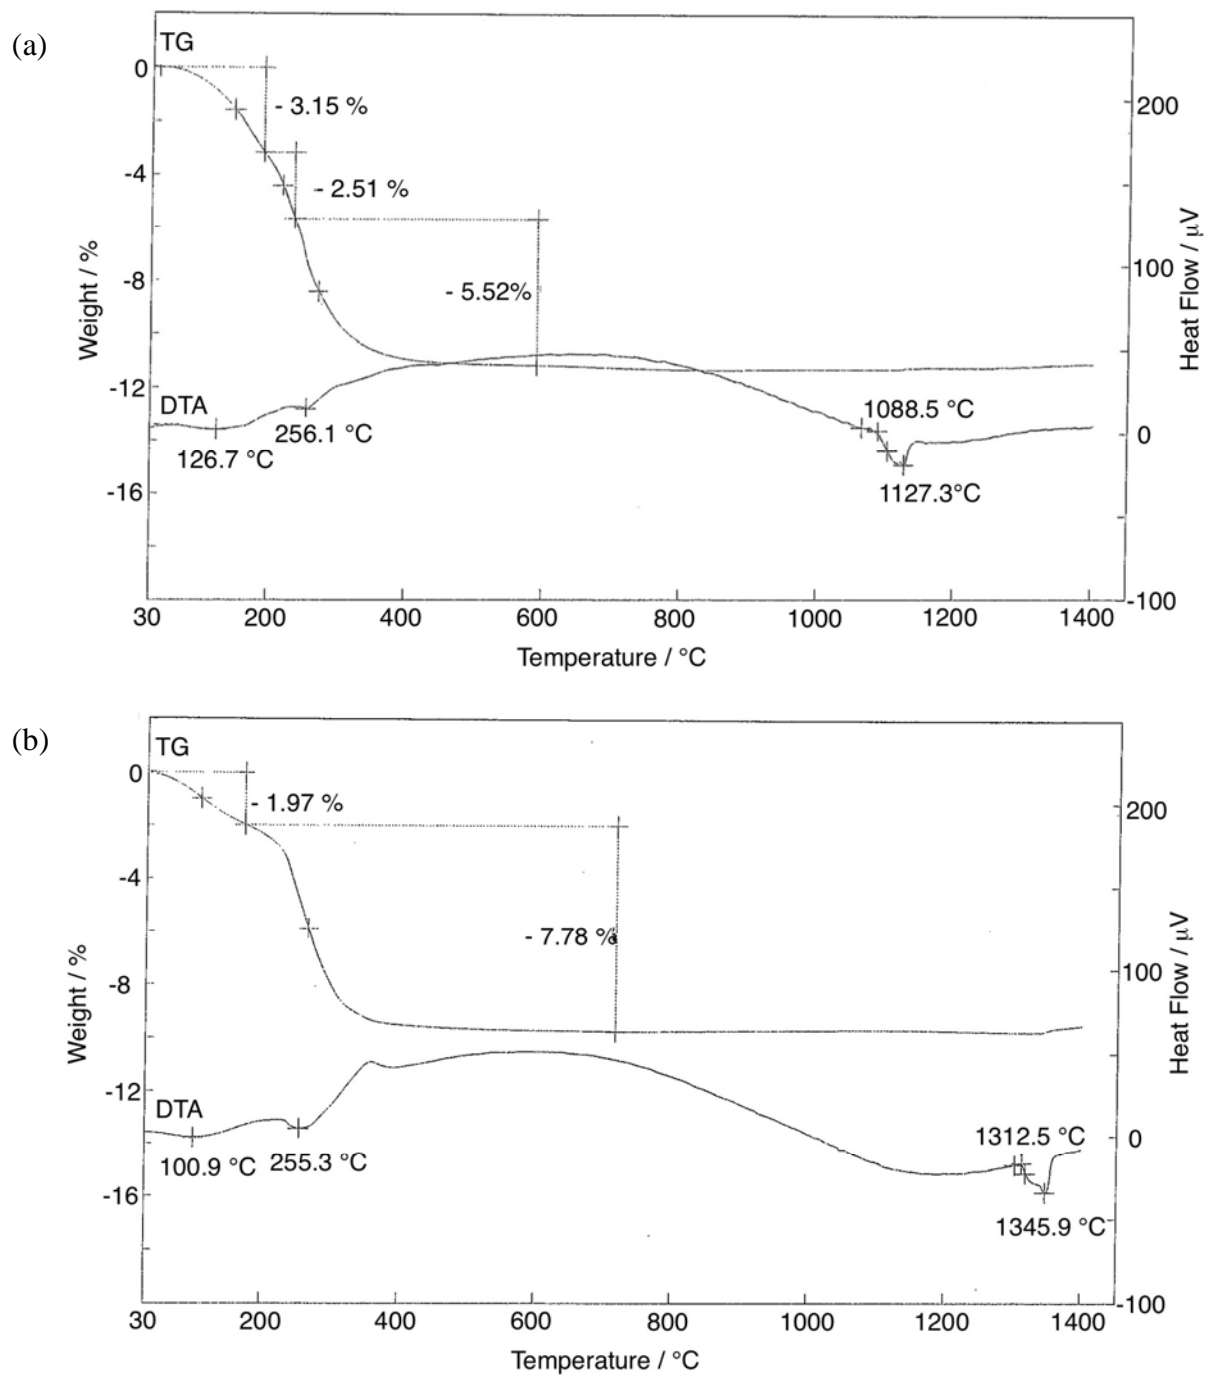

**Figure S6.** TG-DTA measurements of  $\text{Cu}_8\text{Ni}_2$  (a) and  $\text{Cu}_3\text{Ni}_7$  nanoparticles (b) at a heating rate of  $20\text{ °C min}^{-1}$  under a nitrogen flow rate of  $800\text{ ml min}^{-1}$ .

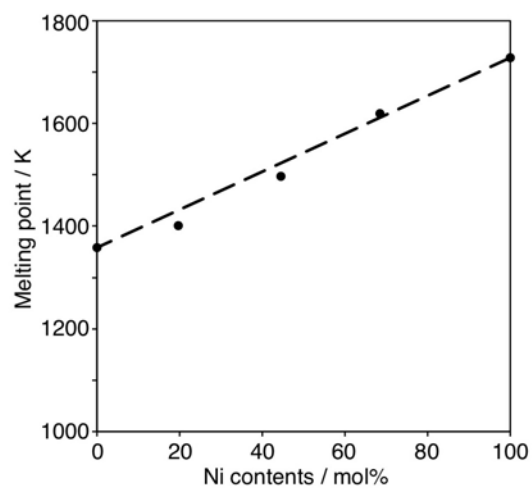

**Figure S7.** Melting points of Ni-1, Cu<sub>3</sub>Ni<sub>7</sub>, Cu<sub>5</sub>Ni<sub>5</sub>, Cu<sub>8</sub>Ni<sub>2</sub> and Cu-2.

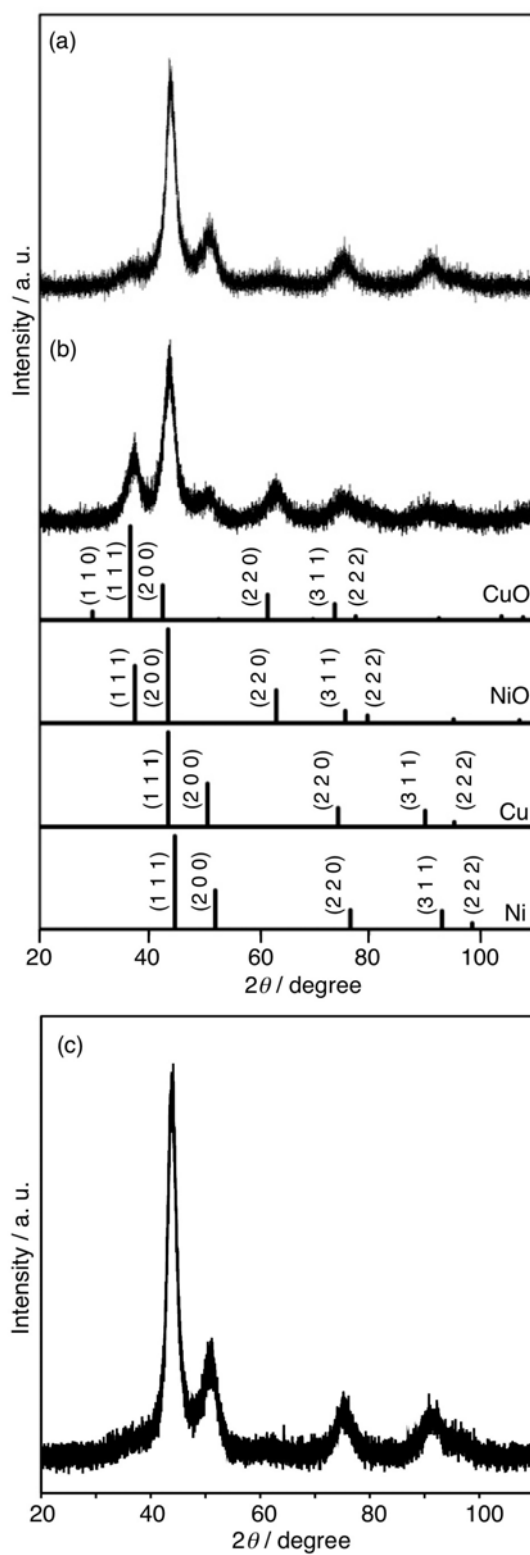

**Figure S8.** XRD patterns of  $\text{Cu}_4\text{Ni}_6$  nanoparticle sample stored at 423 K (a) and 523 K (b) for 1h and stored for one year at room temperature (c) under air.

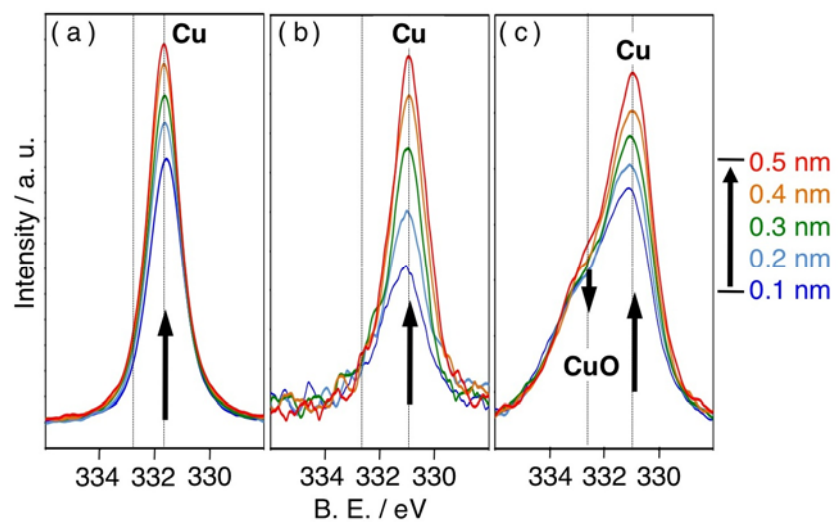

**Figure S9.** Cu 2p<sub>3/2</sub> electron spectra of Cu-2 (a), Cu<sub>4</sub>Ni<sub>6</sub> (b) and Cu<sub>8</sub>Ni<sub>2</sub> (c).

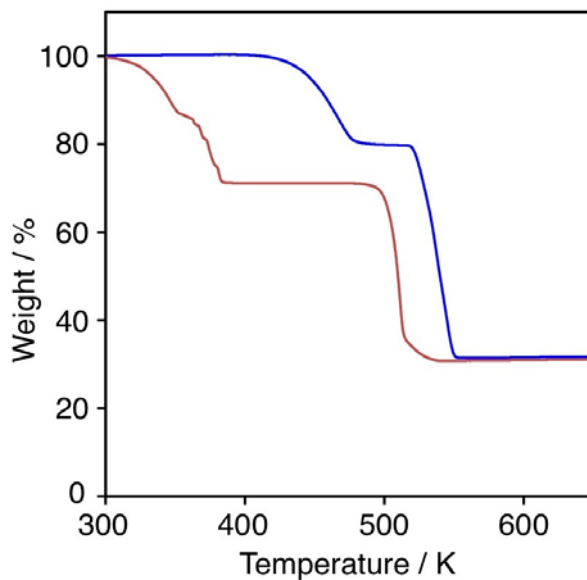

**Figure S10.** TG measurement of the neat formate salts at a heating rate of  $10 \text{ K min}^{-1}$  under a nitrogen flow rate of  $100 \text{ ml min}^{-1}$ , (a) nickel formate dihydrate (Blue line) and (b) copper formate tetra hydrate (Red line).

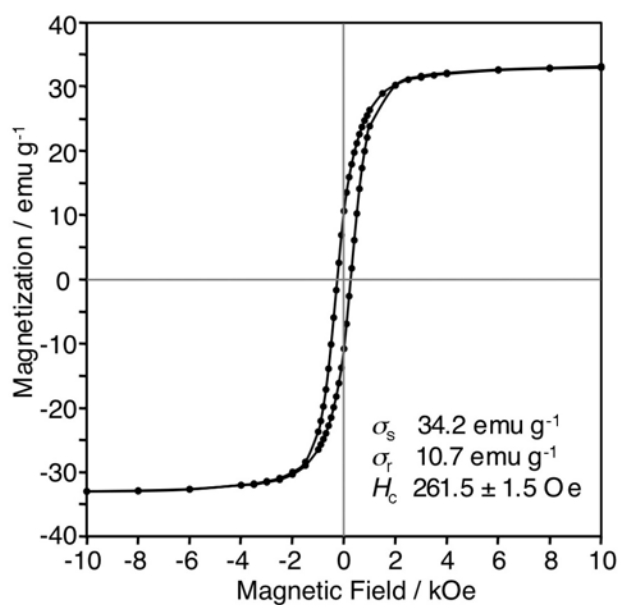

**Figure S11.** Magnetization versus applied field for Ni-2 in FC at 5 K.

## Appendix 1.



The ratio of oleylamine molecules modified on the surface of Cu<sub>4</sub>Ni<sub>6</sub> nanoparticles was estimated as follows. The Cu<sub>4</sub>Ni<sub>6</sub> nanoparticles were oblate spheroid in shape with an eccentricity of 0.91 from TEM images (see Figures 2(a) and 2(b)). Major and minor axes were 11.7 nm and 4.9 nm, denoted as r<sub>a</sub> and r<sub>b</sub>, respectively. The eccentricity (e) was calculated from the formula ( $e^2 = 1 - (r_b / r_a)^2$ ).

The volume (V<sub>Cu-Ni</sub>), the surface area (S<sub>Cu-Ni</sub>) and the weight (W<sub>Cu-Ni</sub>) per one particle of these Cu-Ni nanoparticles was calculated according to the following formulas: (1), (2) and (3), respectively.

$$V_{\text{Cu-Ni}} = (\pi/3) r_a^2 r_b \quad : (1)$$

$$S_{\text{Cu-Ni}} = 2\pi [r_a^2 + (r_b^2 / 2e)\ln\{(1+e)/(1-e)\}] \quad : (2)$$

$$W_{\text{Cu-Ni}} = 4 V_{\text{Cu-Ni}} M_{\text{Cu-Ni}} / (a_{\text{Cu-Ni}}^3 N_A) \quad : (3)$$

(N<sub>A</sub> ; Avogadro constant, a<sub>Cu-Ni</sub>; lattice constant (3.580 Å), which was estimated from XRD analysis. The composition of Cu<sub>4</sub>Ni<sub>6</sub> nanoparticles from TEM-EDS analysis was 39.3 atom%(Cu) and 60.7 atom%(Ni). The average molar weight (M<sub>Cu-Ni</sub>) of Cu<sub>4</sub>Ni<sub>6</sub> was calculated as described follows. M<sub>Cu-Ni</sub> = 0.393 x 63.55(Cu) + 0.607 x 58.69(Ni) = 60.60 )

The content of long-chain amine (oleylamine) in the sample of Cu<sub>4</sub>Ni<sub>6</sub> that was calculated based on weight loss, was ca. 10.0 wt%. The weight and the number of oleylamine (W<sub>oleylamine</sub> and N<sub>oleylamine</sub>) modified on the surface of a particle was described as formulas (4) and (5), respectively.

$$W_{\text{oleylamine}} = (0.100 / 0.900) W_{\text{Cu-Ni}} \quad : (4)$$

$$N_{\text{oleylamine}} = N_A W_{\text{oleylamine}} / 267.50 \quad : (5)$$

Therefore, from the results of S<sub>Cu-Ni</sub> / N<sub>oleylamine</sub>, the molecules of oleylamine were modified on the surface of one particle (Cu<sub>4</sub>Ni<sub>6</sub>) at intervals of 17.3 nm<sup>2</sup>.
